# Supplementary material for: Risk Factors and Outcomes of Patients Colonized with KPC and NDM Carbapenemase-Producing Enterobacterales
Source: MDPI journal article supplement (doi:10.3390/antibiotics13050427), 2024-05-08
Supplement: s1 [file s1]

## Supplementary Table

**Table S1.** Charlson Comorbidity Index co-morbidities; KPC-CPE colonized patients vs. NDM-CPE colonized patients.

| Variable                                              | KPC-CPE<br>n=92 | NDM-CPE<br>n=136 | p-value | OR [95% CI]     |
|-------------------------------------------------------|-----------------|------------------|---------|-----------------|
| Myocardial infarction                                 | 54              | 30               | <0.001  | 5 [2.8 – 8.9]   |
| Congestive heard failure                              | 12              | 24               | 0.459   |                 |
| Peripheral vascular disease                           | 14              | 7                | 0.017   | 3.3 [1.3 – 8.5] |
| Cerebrovascular accident or transient ischemic attack | 14              | 13               | 0.217   |                 |
| Dementia                                              | 20              | 7                | <0.001  | 5 [2 -12.6]     |
| Chronic obstructive pulmonary disease                 | 9               | 20               | 0.315   |                 |
| Connective tissue disease                             | 2               | 5                | 0.704   |                 |
| Peptic ulcer disease                                  | 1               | 2                | 1       |                 |
| Liver disease                                         | 8               | 0                | <0.001  | undefined       |
| Diabetes mellitus                                     | 35              | 42               | 0.32    |                 |
| Hemiplegia                                            | 13              | 10               | 0.12    |                 |
| Moderate to severe chronic kidney disease             | 18              | 21               | 0.476   |                 |
| Solid tumor                                           | 7               | 11               | 1       |                 |
| Leukemia                                              | 2               | 0                | 0.163   |                 |
| Lymphoma                                              | 3               | 5                | 1       |                 |
| AIDS                                                  | 1               | 0                | 0.406   |                 |
